# Supplementary material for: Can Private Money Buy Public Science? Disease Group Lobbying and Federal Funding for Biomedical Research
Source: Atypon-hosted journal article supplement (doi:10.1287/mnsc.2014.2107), 2015-04-08
Supplement: mnsc.2014.2107-sm-onlineappendix.pdf [file mnsc.2014.2107-sm-onlineappendix.pdf]

## Online Appendix

### Can private money buy public science? Disease group lobbying and federal funding for biomedical research

Deepak Hegde<sup>†</sup> and Bhaven Sampat<sup>‡</sup>

**Figure A1: Keyword search algorithm v/s NIH-RCDC**

Figure shows NIH funding numbers for 33 rare diseases as calculated by our keyword search (on the X-axis) and as reported by NIH's Research and Conditions Disease Categorization (RCDC) initiative for the year 2008. Both funding numbers are in millions of dollars.

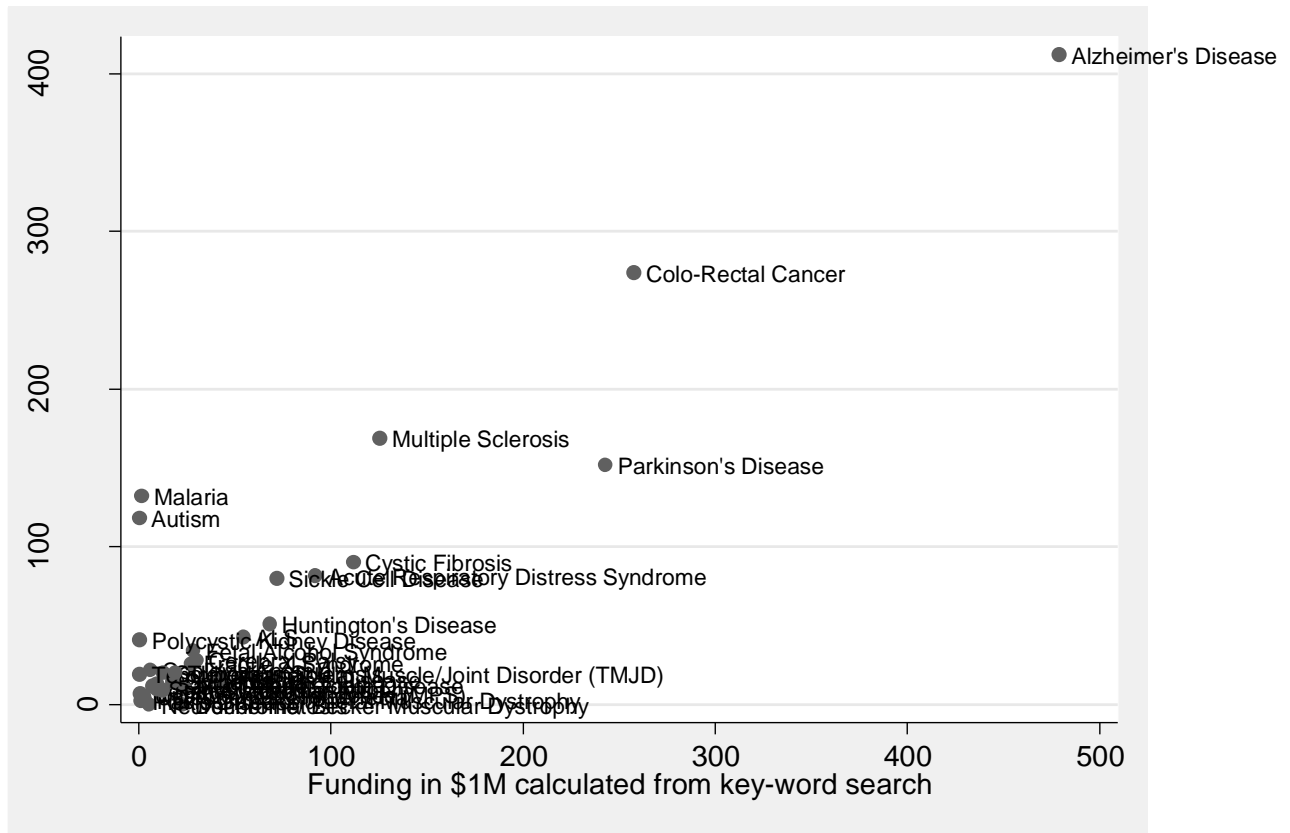

<sup>†</sup> New York University; email: [dhegde@stern.nyu.edu](mailto:dhegde@stern.nyu.edu)

<sup>‡</sup> Columbia University; email: [bns3@columbia.edu](mailto:bns3@columbia.edu)

**Figure A2: Year-to-year within disease changes in lobbying expenditures**

Figure presents box plots of the distribution of year-to-year changes in within-disease lobbying expenditures calculated as the percentage difference between previous year and current year lobbying expenditures associated with each disease. The upper and lower hinges of each box represents the 25<sup>th</sup> and 75<sup>th</sup> percentiles of the percentage differences for each year and the line in the box represents the median difference. The upper and lower whiskers depict the upper and lower adjacent values for the years respectively. Years with more “spread out” distributions (both below and above zero) are more likely to be those in which there was a larger change in the cross-disease composition of lobbying expenditures.

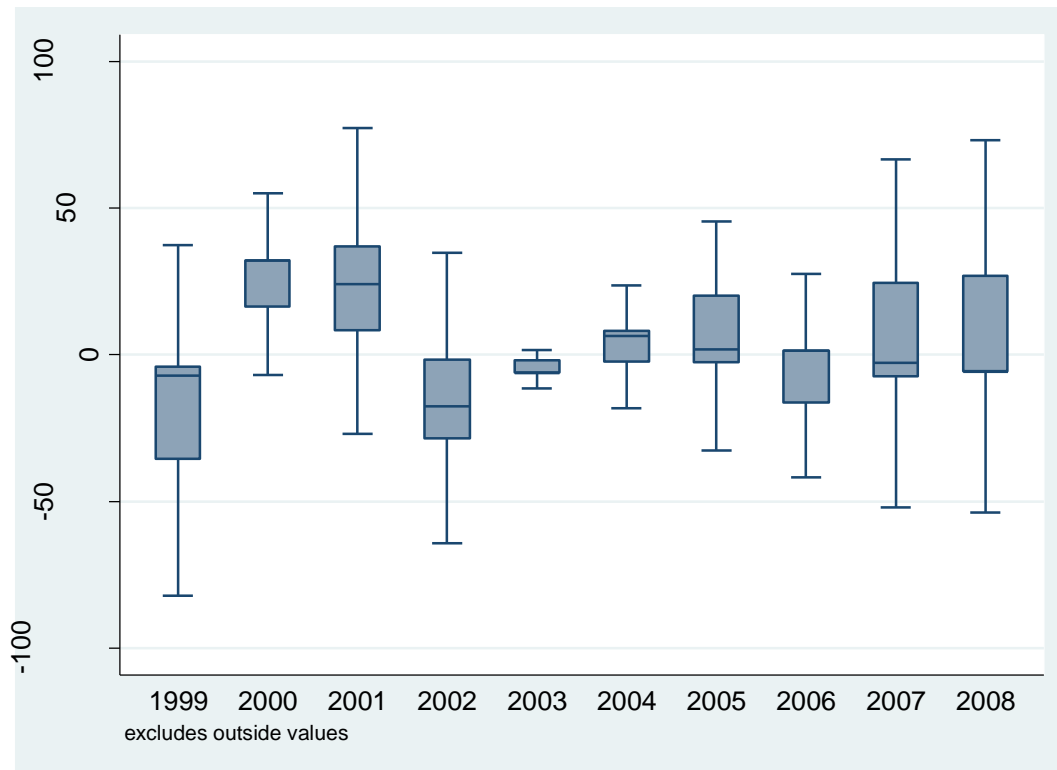

**Table A1: Research-related lobbying interest groups**

The following list of lobbying organizations was compiled from the disclosures of lobbying activities filed with the Secretary of the Senate's Office of Public Records (SOPR) and available from the Center for Responsive Politics. The organizations had spent at least \$10,000 in one of the six-month periods on lobbying between 1998 and 2008, and disclosed some interest in research on at least one of the 955 rare diseases in our sample.

---

|                                         |                                        |
|-----------------------------------------|----------------------------------------|
| ALZHEIMER'S ASSN                        | INTERSTITIAL CYSTITIS ASSN             |
| AMERICAN CANCER SOCIETY                 | IRON DISORDERS INSTITUTE               |
| AMERICAN FOUNDATION FOR AIDS RESEARCH   | JEFFREY MODELL FOUNDATION              |
| AMERICAN HEART ASSN                     | KENNEDY KRIEGER INSTITUTE              |
| AMERICAN LIVER FOUNDATION               | KIDNEY CANCER ASSN                     |
| AMERICAN SOCIAL HEALTH ASSN             | LANCE ARMSTRONG FOUNDATION             |
| AMERICAN SPINAL INJURY ASSN             | LYMPHOMA RESEARCH FOUNDATION           |
| AMERICAN TINNITUS ASSN                  | MULTIPLE MYELOMA RESEARCH FOUNDATION   |
| ARTHRITIS FOUNDATION                    | MUSCULAR DYSTROPHY ASSN                |
| AUTISM SOCIETY OF AMERICA               | MYOSITIS ASSN                          |
| AUTISM SPEAKS                           | NATIONAL ALLIANCE FOR THE MENTALLY ILL |
| CHARCOT-MARIE-TOOTH ASSN                | NATIONAL DOWN SYNDROME CONGRESS        |
| CHILDREN'S TUMOR FOUNDATION             | NATIONAL FRAGILE X FOUNDATION          |
| CHRISTOPHER REEVE PARALYSIS FOUNDATION  | NATIONAL KIDNEY FOUNDATION             |
| CROHN'S & COLITIS FOUNDATION OF AMERICA | NATIONAL MARFRAN FOUNDATION            |
| CYSTIC FIBROSIS FOUNDATION              | NATIONAL MULTIPLE SCLEROSIS SOCIETY    |
| DEAFNESS RESEARCH FOUNDATION            | NATIONAL SLEEP FOUNDATION              |
| DYSTONIA MEDICAL RESEARCH FOUNDATION    | NATIONAL STROKE ASSN                   |
| EYE BANK ASSN OF AMERICA                | NATL CENTER FOR LEARNING DISABILITIES  |
| FRIEDREICHS ATAXIA RESEARCH ALLIANCE    | NEUROFIBROMATOSIS FOUNDATION           |
| FRIENDS OF CANCER RESEARCH              | NEUROPATHY ASSN                        |
| GENETIC ALLIANCE                        | SCHEPENS EYE RESEARCH INSTITUTE        |
| HUNTINGTON'S DISEASE SOCIETY OF AMERICA | SCLERODERMA FOUNDATION                 |
| IMMUNE DEFICIENCY FOUNDATION            | SPINA BIFIDA ASSN OF AMERICA           |
| INTERNATIONAL MYELOMA FOUNDATION        | TRIGEMINAL NEURALGIA ASSN              |
| INTERNATIONAL RETT SYNDROME ASSN        | TUBEROUS SCLEROSIS ALLIANCE            |

---

**Table A2: Number of publications and scientific opportunity**

Table reports the annual number of publications associated with each disease, and the years in which scientific advances associated with the disease were reported in media articles. We also reference the earliest article (between 1998 and 2006) that reported the advance corresponding to the disease below.

| Disease                                    | 1998 | 1999 | 2000 | 2001 | 2002 | 2003 | 2004 | 2005 | 2006 | Years of advance |
|--------------------------------------------|------|------|------|------|------|------|------|------|------|------------------|
| ALEXANDER DISEASE (a)                      | 0    | 0    | 0    | 0    | 5    | 15   | 9    | 9    | 18   | 2001, 06         |
| ATRIAL SEPTAL DEFECTS (b)                  | 207  | 210  | 206  | 268  | 258  | 308  | 347  | 323  | 383  | 2002, 06         |
| COLITIS, COLLAGENOUS (c)                   | 0    | 0    | 0    | 0    | 0    | 0    | 5    | 20   | 24   | 2003, 06         |
| DISTAL MYOPATHY (d)                        | 0    | 0    | 0    | 0    | 0    | 0    | 4    | 12   | 10   | 2004, 05         |
| ENCEPHALITIS, HERPES SIMPLEX (e)           | 2    | 17   | 37   | 55   | 51   | 58   | 54   | 58   | 54   | 2003,04,05       |
| ERYTHROPOIETIC PROTOPORPHYRIA (f)          | 2    | 5    | 4    | 2    | 2    | 0    | 3    | 19   | 20   | 2005             |
| FACIOSCAPULOHUMERAL MUSCULAR DYSTROPHY (g) | 0    | 12   | 11   | 16   | 23   | 22   | 31   | 29   | 26   | 2002,04          |
| GASTROINTESTINAL STROMAL TUMORS (h)        | 0    | 0    | 1    | 0    | 0    | 6    | 89   | 277  | 311  | 2005,06          |
| RETINOSCHISIS (i)                          | 0    | 0    | 0    | 1    | 7    | 21   | 19   | 28   | 29   | 2002,05          |
| RETT SYNDROME (j)                          | 50   | 52   | 54   | 122  | 72   | 82   | 51   | 101  | 94   | 1999             |
| HERMANSKY PUDLAK SYNDROME (k)              | 0    | 1    | 6    | 17   | 20   | 21   | 22   | 25   | 22   | 2005             |
| NEUROMYOTONIA (l)                          | 0    | 6    | 18   | 7    | 8    | 3    | 9    | 9    | 24   | 2003, 06         |

(a) "Genetic Basis of Disease Discovered," *Pain & Central Nervous System Week*, 27 January 2001

(b) "Making repairs without lifting the hood," *The Globe and Mail*, 19 November 2002

(c) "Collagenous colitis with pseudomembrane formation may occur with Ig deficiency," *Health and Medicine Week*, 10 November 2003

(d) "Mutations toward the 3' end of MYH7 cause early-onset distal myopathy" *Obesity, Fitness & Wellness Week*, 13 November 13 2004

(e) "HSV Encephalitis; Pediatric encephalitis relapses may be due to HSV replication or inflammation" *Obesity, Drug Week*, 26 September 2003

(f) "ABCG2 has role in regulating PPIX levels during erythroid differentiation" *Life Science Weekly*, 24 May 2005

(g) "Muscular Dystrophy: Scientists identify a new kind of genetic problem," *Genomics & Genetics Weekly* 27 September 2002

(h) "Gastrointestinal Stromal Tumors; Radiologic findings of ruptured gastrointestinal stromal tumors described" *Cancer Weekly*, 27 Dec 2005

(i) "Vitreous detachments and retinal holes," *Optician*, 27 Sep 2002

(j) "Rett syndrome is caused by mutations in X-linked MECP2," <http://www.rsrt.org/rett-and-mecp2-disorders/rett-syndrome/>

(k) "Lung pathology studied, correlation with interstitial inflammation revealed," *Science Letter*, 3 MAY 2005

(l) "Neuroimmunology; Myokymia, dermatomyositis cause may be antibodies to voltage-gated K+ channels" *Medical Devices & Surgical Technology Week*, 24 AUG 2003

**Table A3: Relationship between soft earmarks and lobbying**

Table reports estimates of the effect of previous year lobbying expenditures of research-related interest groups, NIH grants, deaths, and publications on earmarks. Column 1 reports OLS estimates obtained by specifying the dependent variable as the number of earmarks. Column 2 reports OLS estimates obtained by specifying the dependent variable as log(1+ the number of earmarks). Column 3 reports Logit estimates obtained by specifying the dependent variable as a dummy variable that indicates the presence of at least an earmark (for the disease-year). Column 4 reports Poisson pseudo-maximum-likelihood (PPML) estimates obtained by specifying the dependent variable as the number of earmarks. The unit of observation for all estimations is disease-year, and the sample has observations for 955 diseases for each year between 1998 and 2008. All S.E.s, in brackets, are clustered at the disease-level: + p<0.1; \* p<0.05; \*\* p<0.01.

| Column #                                  | 1                 | 2                    | 3                 | 4                  |
|-------------------------------------------|-------------------|----------------------|-------------------|--------------------|
| Specification                             | OLS               | OLS                  | Logit             | PPML               |
| D.V.                                      | N. of earmarks    | log(1+N of earmarks) | Earmarks (0/1)    | N. of earmarks     |
| Log Lobbying expenditures (1-year lagged) | 0.246*<br>[0.115] | 0.059*<br>[0.027]    | 0.581*<br>[0.288] | 0.388**<br>[0.091] |
| Log Deaths (1-year lagged)                | 0.008<br>[0.019]  | -0.003<br>[0.006]    | -0.416<br>[0.331] | -0.332*<br>[0.148] |
| Log Publications (1-year lagged)          | 0.027<br>[0.022]  | 0.013<br>[0.010]     | 1.079+<br>[0.596] | 0.488+<br>[0.274]  |
| Log NIH grants (1-year lagged)            | 0.001<br>[0.002]  | 0.001<br>[0.001]     | 0.021<br>[0.111]  | 0.03<br>[0.050]    |
| Constant                                  | -0.14             | -0.02                | -6.21             | -3.26              |
| Disease fixed-effects (955)               | Y                 | Y                    | Y                 | Y                  |
| Year fixed-effects (10)                   | Y                 | Y                    | Y                 | Y                  |
| Observations                              | 9,550             | 9,550                | 9,550             | 9,550              |
| Adjusted R-square                         | 0.606             | 0.660                |                   |                    |
| Log Pseudo Likelihood                     |                   |                      | -355.4            | -842.0             |

**Table A4: Yearly estimates of the relationship between earmarks and lobbying**

Table reports ordinary least squares estimates of the effects of lobbying on congressional soft earmarks for each of the years during the 1999-2008 period. The unit of observation in the estimation sample is disease-year, and the sample has observations for 955 diseases for each year between 1998 and 2008. All S.E.s, in brackets, are clustered at the disease-level; +  $p < 0.1$ ; \*  $p < 0.05$ ; \*\*  $p < 0.01$ .

| D.V.= No. of earmarks            |                   |
|----------------------------------|-------------------|
| Log Lobbying Exp. X Y1999        | 0.230+<br>[0.123] |
| Log Lobbying Exp. X Y2000        | 0.273+<br>[0.140] |
| Log Lobbying Exp. X Y2001        | 0.285*<br>[0.133] |
| Log Lobbying Exp. X Y2002        | 0.220+<br>[0.115] |
| Log Lobbying Exp. X Y2003        | 0.206+<br>[0.112] |
| Log Lobbying Exp. X Y2004        | 0.263*<br>[0.125] |
| Log Lobbying Exp. X Y2005        | 0.252*<br>[0.120] |
| Log Lobbying Exp. X Y2006        | 0.272*<br>[0.126] |
| Log Lobbying Exp. X Y2007        | 0.260*<br>[0.118] |
| Log Lobbying Exp. X Y2008        | 0.244*<br>[0.115] |
| Log Deaths (1-year lagged)       | 0.007<br>[0.019]  |
| Log Publications (1-year lagged) | 0.026<br>[0.022]  |
| Log NIH grants (1-year lagged)   | 0.001<br>[0.002]  |
| Constant                         | -0.128            |
| Disease fixed-effects (955)      | Y                 |
| Year fixed-effects (10)          | Y                 |
| Observations                     | 9,550             |
| Adjusted R-square                | 0.608             |

**Table A5: Relationship between earmarks and lobbying by Congressional chamber**

Table reports Ordinary Least Squares (OLS) estimates of the effect of lobbying by research-related interest groups on the number of current year earmarks. Column 1 reports estimates of the effects of the explanatory variables on the earmarks by both chambers, Column 2 on earmarks by the House appropriations committee, and Column 3 on earmarks by the Senate appropriations committee. The unit of observation in the estimation sample is disease-year, and the sample has observations for 955 diseases for each year between 1998 and 2008. All S.E.s, in brackets, are clustered at the disease-level; + p<0.1; \* p<0.05; \*\* p<0.01.

| Column #                                  | 1                 | 2                 | 3                 |
|-------------------------------------------|-------------------|-------------------|-------------------|
| D.V.= No. of earmarks                     | Both<br>Chambers  | House             | Senate            |
| Log Lobbying expenditures (1-year lagged) | 0.246*<br>[0.115] | 0.096*<br>[0.049] | 0.150*<br>[0.072] |
| Log Deaths (1-year lagged)                | 0.008<br>[0.019]  | -0.008<br>[0.007] | 0.016<br>[0.016]  |
| Log Publications (1-year lagged)          | 0.027<br>[0.022]  | 0.007<br>[0.006]  | 0.02<br>[0.017]   |
| Log NIH grants (1-year lagged)            | 0.001<br>[0.002]  | 0.001<br>[0.001]  | 0<br>[0.001]      |
| Constant                                  | -0.14             | -0.03             | -0.11             |
| Disease fixed-effects (955)               | Y                 | Y                 | Y                 |
| Year fixed-effects (10)                   | Y                 | Y                 | Y                 |
| Observations                              | 9,550             | 9,550             | 9,550             |
| Adjusted R-square                         | 0.606             | 0.482             | 0.606             |

**Table A6: Size and duration of unsolicited projects and solicited projects**

Table shows the average size (in millions of 2010 dollars), duration in years, and proportion of grants that were awarded for “centers” (rather than research projects) under each of the two distinct NIH grant mechanisms (Request for applications (RFAs) and program announcements (PA) grant mechanisms, and grants for unsolicited investigator-initiated projects (II). Duration is calculated as the total number of years for which each grant is awarded (through continuation of the original award). Since we do not have data on grants after 2008, both average grant size and durations are subject to censoring for the later years.

| Year      | Average grant size |              | Average grant duration |              | Share of "center" grants |              |
|-----------|--------------------|--------------|------------------------|--------------|--------------------------|--------------|
|           | II-grants          | RF+PA grants | II-grants              | RF+PA grants | II-grants                | RF+PA grants |
| 1998      | 1,094,517          | 3,210,097    | 3.7                    | 4.4          | 2.3%                     | 16.9%        |
| 1999      | 1,333,978          | 3,665,024    | 4.1                    | 5.0          | 2.8%                     | 12.6%        |
| 2000      | 1,161,284          | 2,615,332    | 3.8                    | 4.3          | 1.3%                     | 5.7%         |
| 2001      | 1,164,530          | 2,260,154    | 3.6                    | 4.3          | 1.2%                     | 8.2%         |
| 2002      | 1,283,886          | 1,446,020    | 3.6                    | 3.8          | 2.0%                     | 1.7%         |
| 2003      | 1,202,673          | 3,227,665    | 3.5                    | 3.8          | 2.2%                     | 5.4%         |
| 2004      | 1,117,947          | 1,974,653    | 3.3                    | 3.2          | 1.3%                     | 6.5%         |
| 2005      | 949,604            | 2,851,004    | 2.9                    | 3.3          | 1.4%                     | 4.9%         |
| 2006      | 741,512            | 1,168,044    | 2.4                    | 2.6          | 1.4%                     | 4.0%         |
| 2007      | 547,224            | 964,521      | 1.8                    | 1.9          | 0.9%                     | 6.4%         |
| 2008      | 295,937            | 470,329      | 1.0                    | 1.0          | 0.7%                     | 1.9%         |
| 1998-2008 | 961,057            | 2,088,348    | 3.0                    | 3.3          | 1.8%                     | 5.9%         |

**Table A7: The relationship between lobbying and disease-characteristics  
(with alternative measures of disease burden and scientific opportunity)**

Table reports Ordinary Least Squares (OLS) estimates of the effect of lagged deaths, hospital utilization, publications (weighted by the impact factors of the corresponding journals) and NIH funding on current year expenditures of research-related lobbying interest groups. The unit of observation in the estimation sample is disease-year, and the sample has observations for 955 diseases for each year between 1998 and 2008. All S.E.s, in brackets, are clustered at the disease-level: + p<0.1; \* p<0.05; \*\* p<0.01.

| Column #                                 | 1                  | 2                 | 3                  | 4                 | 5                 |
|------------------------------------------|--------------------|-------------------|--------------------|-------------------|-------------------|
| <b>D.V.= Log Lobbying expenditures</b>   |                    |                   |                    |                   |                   |
| Log Deaths (1-year lagged)               | 0.066**<br>[0.021] | 0.052*<br>[0.024] | 0.051*<br>[0.024]  | 0.051*<br>[0.024] | 0.051*<br>[0.024] |
| Log Hospital Utilization (1-year lagged) | 0.004<br>[0.009]   | -0.003<br>[0.010] | -0.003<br>[0.010]  | -0.011<br>[0.009] |                   |
| Log JIF-weighted Pubs. (1-year lagged)   | 0.052**<br>[0.019] | 0.021*<br>[0.009] | 0.019*<br>[0.009]  | 0.015+<br>[0.009] |                   |
| Log Pubs. (5-year Stock)                 |                    |                   |                    |                   | 0.013+<br>[0.007] |
| Log NIH grants (1-year lagged)           |                    |                   | 0.009**<br>[0.003] | 0.005<br>[0.003]  | 0.005+<br>[0.003] |
| Constant                                 | 0.374              | 0.505             | 0.482              | 0.412             | 0.364             |
| Disease fixed-effects (955)              | N                  | Y                 | Y                  | Y                 | Y                 |
| Year fixed-effects (10)                  | N                  | N                 | N                  | Y                 | Y                 |
| Observations                             | 9,550              | 9,550             | 9,550              | 9,550             | 9,550             |
| Adjusted R-square                        | 0.038              | 0.904             | 0.905              | 0.907             | 0.907             |

**Table A8: The relationship between earmarks and lobbying  
(with alternative measures of disease burden and scientific opportunity)**

Table reports OLS estimates of the effect of lagged deaths, hospital utilization, and publications (weighted by the impact factors of the corresponding journals) and NIH funding on the number of current year earmarks. The unit of observation in the estimation sample is disease-year, and the sample has observations for 955 diseases for each year between 1998 and 2008. All S.E.s, in brackets, are clustered at the disease-level: + p<0.1; \* p<0.05; \*\* p<0.01.

| Column #                                  | 1       | 2       | 3       | 4       | 5       | 6       |
|-------------------------------------------|---------|---------|---------|---------|---------|---------|
| Specification                             | OLS     | OLS     | OLS     | OLS     | OLS     | OLS     |
| D.V.= No. of earmarks                     |         |         |         |         |         |         |
| Log Lobbying expenditures (1-year lagged) |         | 0.043+  | 0.244*  | 0.244*  | 0.247*  | 0.246*  |
|                                           |         | [0.023] | [0.114] | [0.114] | [0.115] | [0.115] |
| Log Deaths (1-year lagged)                | 0.039** | 0.036** | 0.006   | 0.006   | 0.008   | 0.009   |
|                                           | [0.013] | [0.013] | [0.019] | [0.019] | [0.019] | [0.019] |
| Log Hospital Utilization (1-year lagged)  | 0.003   | 0.003   | 0.018+  | 0.018+  | 0.016   |         |
|                                           | [0.004] | [0.004] | [0.010] | [0.010] | [0.010] |         |
| Log JIF-weighted Pubs. (1-year lagged)    | 0.034** | 0.032** | 0.015   | 0.015   | 0.014   |         |
|                                           | [0.008] | [0.008] | [0.013] | [0.013] | [0.013] |         |
| Log Pubs. (5-year Stock)                  |         |         |         |         |         | 0.011   |
|                                           |         |         |         |         |         | [0.008] |
| Log NIH grants (1-year lagged)            |         |         |         | 0.001   | 0.001   | 0.001   |
|                                           |         |         |         | [0.002] | [0.002] | [0.002] |
| Constant                                  | -0.072  | -0.088  | -0.182  | -0.185  | -0.182  | -0.118  |
| Disease fixed-effects (955)               | N       | N       | Y       | Y       | Y       | Y       |
| Year fixed-effects (10)                   | N       | N       | N       | N       | Y       | Y       |
| Observations                              | 9,550   | 9,550   | 9,550   | 9,550   | 9,550   | 9,550   |
| Adjusted R-square                         | 0.05    | 0.056   | 0.605   | 0.605   | 0.607   | 0.606   |

**Table A9: The relationship between NIH grants and earmarks  
(with alternate measures of disease burden and scientific opportunity)**

Table presents ordinary least squares (OLS) estimates of the effect of past year (logged) earmarks and (logged) lobbying expenditures on (logged) current year NIH funding for diseases. Columns 1-8 provide estimates of the effects of the explanatory variables on all new NIH funding. RFAs are grants through requests for applications and PAs are grants through program announcements. II indicates grants for unsolicited investigator-initiated projects. The unit of observation in the estimation sample is disease-year, and the sample has observations for 955 diseases for each year between 1998 and 2008. All S.E.s, in brackets, are clustered at the disease-level: + p<0.1; \* p<0.05; \*\* p<0.01.

| Column #                                  | 1                   | 2                  | 3                  | 4                  | 5                   | 6                  | 7                  | 8                  |
|-------------------------------------------|---------------------|--------------------|--------------------|--------------------|---------------------|--------------------|--------------------|--------------------|
| D.V.= Log NIH grants                      | All                 | RF+PA              | PA                 | II                 | All                 | RF+PA              | PA                 | II                 |
| Earmarks (1-year lagged)                  | 0.054+<br>[0.031]   | 0.165**<br>[0.060] | 0.214**<br>[0.061] | 0.047<br>[0.043]   | 0.056+<br>[0.031]   | 0.167**<br>[0.060] | 0.216**<br>[0.061] | 0.048<br>[0.043]   |
| Log Lobbying expenditures (1-year lagged) | -0.004<br>[0.053]   | 0.001<br>[0.062]   | 0.059<br>[0.067]   | 0.004<br>[0.058]   | -0.004<br>[0.053]   | 0.001<br>[0.062]   | 0.056<br>[0.067]   | 0.003<br>[0.058]   |
| Log Deaths (1-year lagged)                | -0.037<br>[0.077]   | 0.112<br>[0.099]   | 0.084<br>[0.074]   | -0.029<br>[0.072]  | -0.036<br>[0.077]   | 0.113<br>[0.099]   | 0.085<br>[0.073]   | -0.028<br>[0.072]  |
| Log Hospital Utilization (1-year lagged)  | 0.002<br>[0.026]    | 0.002<br>[0.025]   | 0.034+<br>[0.019]  | 0.024<br>[0.025]   |                     |                    |                    |                    |
| Log JIF-weighted Pubs. (1-year lagged)    | 0.077+<br>[0.042]   | 0.070*<br>[0.034]  | 0.037<br>[0.027]   | 0.044<br>[0.043]   |                     |                    |                    |                    |
| Log Pubs. (5-year Stock)                  |                     |                    |                    |                    | 0.004<br>[0.019]    | 0.008<br>[0.018]   | -0.028+<br>[0.016] | -0.018<br>[0.018]  |
| Log NIH grants (1-year lagged)            | -0.047**<br>[0.015] | -0.009<br>[0.009]  | 0<br>[0.006]       | -0.035*<br>[0.014] | -0.046**<br>[0.015] | -0.008<br>[0.009]  | 0.001<br>[0.006]   | -0.034*<br>[0.014] |
| Constant                                  | 1.799               | 0.374              | 0.194              | 1.582              | 1.981               | 0.536              | 0.423              | 1.785              |
| Disease fixed-effects (955)               | N                   | Y                  | Y                  | Y                  | Y                   | Y                  | Y                  | Y                  |
| Year fixed-effects (10)                   | Y                   | Y                  | Y                  | Y                  | Y                   | Y                  | Y                  | Y                  |
| Observations                              | 9,550               | 9,550              | 9,550              | 9,550              | 9,550               | 9,550              | 9,550              | 9,550              |
| Adjusted R-square                         | 0.693               | 0.591              | 0.572              | 0.674              | 0.693               | 0.591              | 0.572              | 0.674              |
